# Supplementary material
Source: MDPI journal article supplement (https://www.mdpi.com/2073-4441/14/22/3642)
Supplement: s1 [file s1]

## Supplementary Materials for

# Application of coagulation and foam concentration method to quantify waterborne pathogens in river water samples

**Yoshihiro Suzuki<sup>1\*</sup>, Atsushi Jikumaru<sup>1</sup>, Soichiro Tamai<sup>1</sup>, Kei Nukazawa<sup>1</sup>, Yoshifumi Masago<sup>2</sup>, Satoshi Ishii<sup>3, 4</sup>**

<sup>1</sup>Department of Civil and Environmental Engineering, Faculty of Engineering, University of Miyazaki, Miyazaki, Japan

<sup>2</sup>Center for Social and Environmental Systems Research, National Institute for Environmental Studies, Ibaraki, Japan

<sup>3</sup>Department of Soil, Water, and Climate, University of Minnesota, Minnesota, USA

<sup>4</sup>BioTechnology Institute, University of Minnesota, Minnesota, USA

\*Correspondence: [ysuzuki@cc.miyazaki-u.ac.jp](mailto:ysuzuki@cc.miyazaki-u.ac.jp); Tel.: +81-985-58-7339

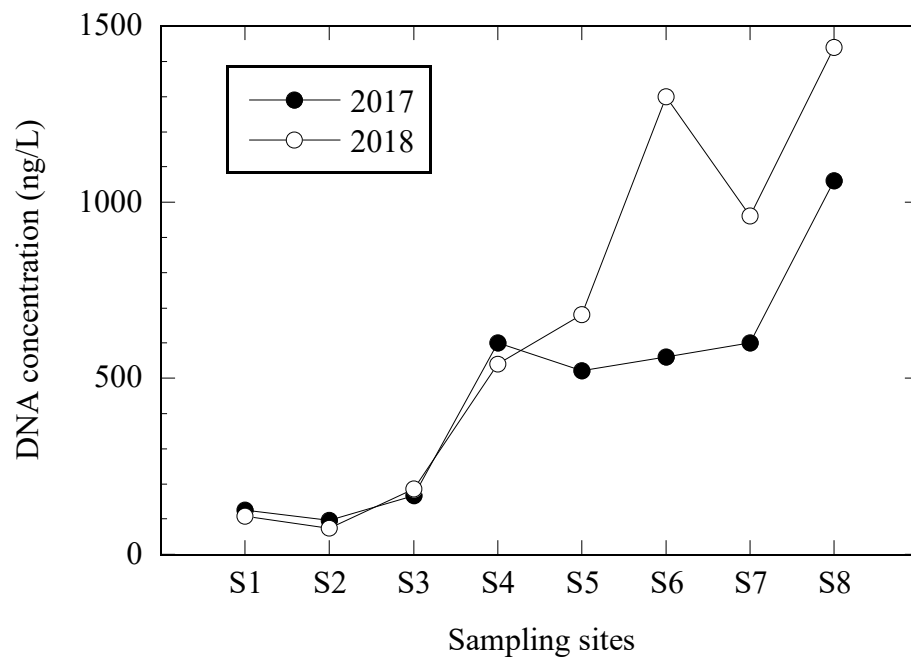

Figure S1. Changes in the DNA concentration at each sampling site in the Kiyotake River.

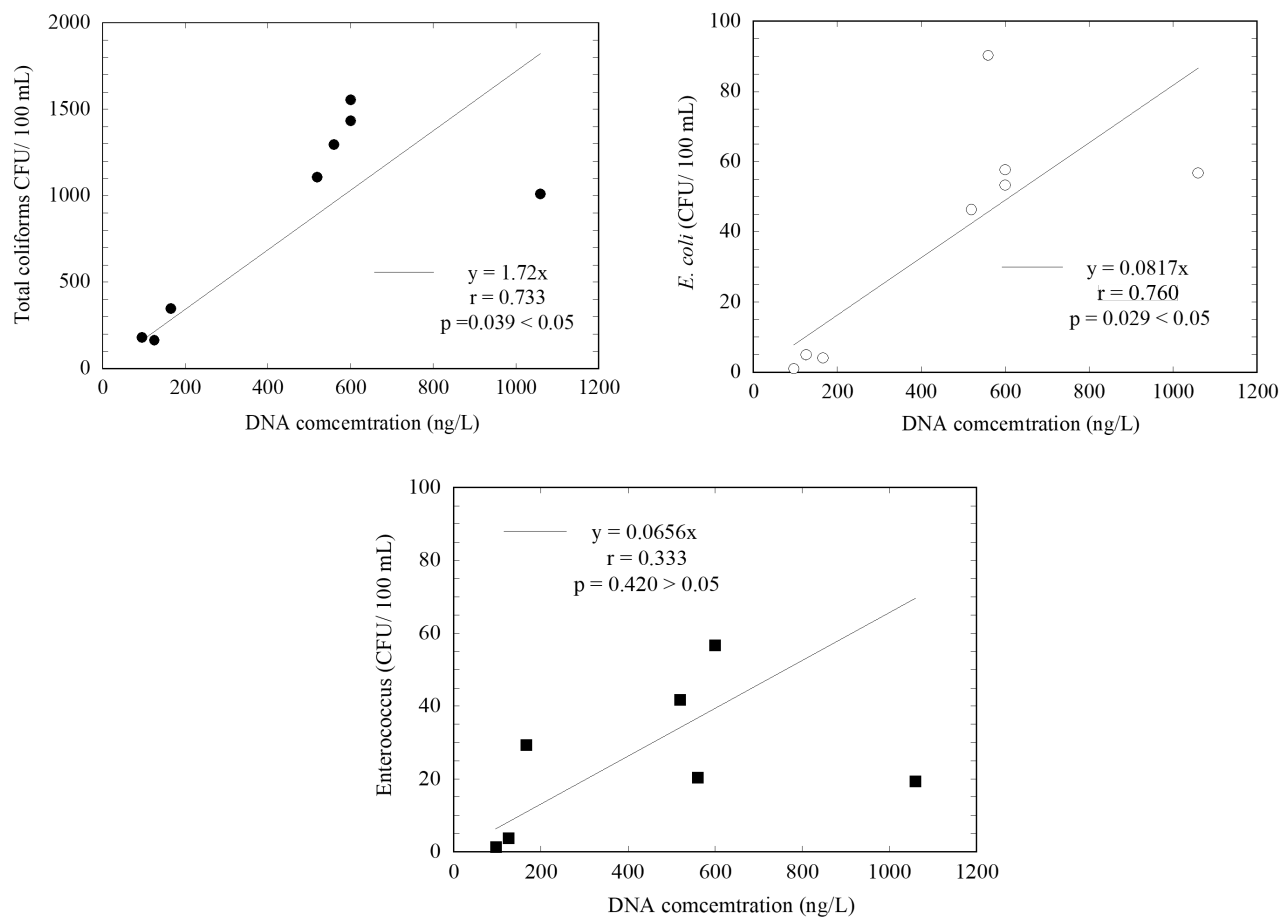

Figure S2. Correlations between DNA concentration and the counts of fecal indicator bacteria (total coliforms, *E. coli*, and Enterococcus) along the river.

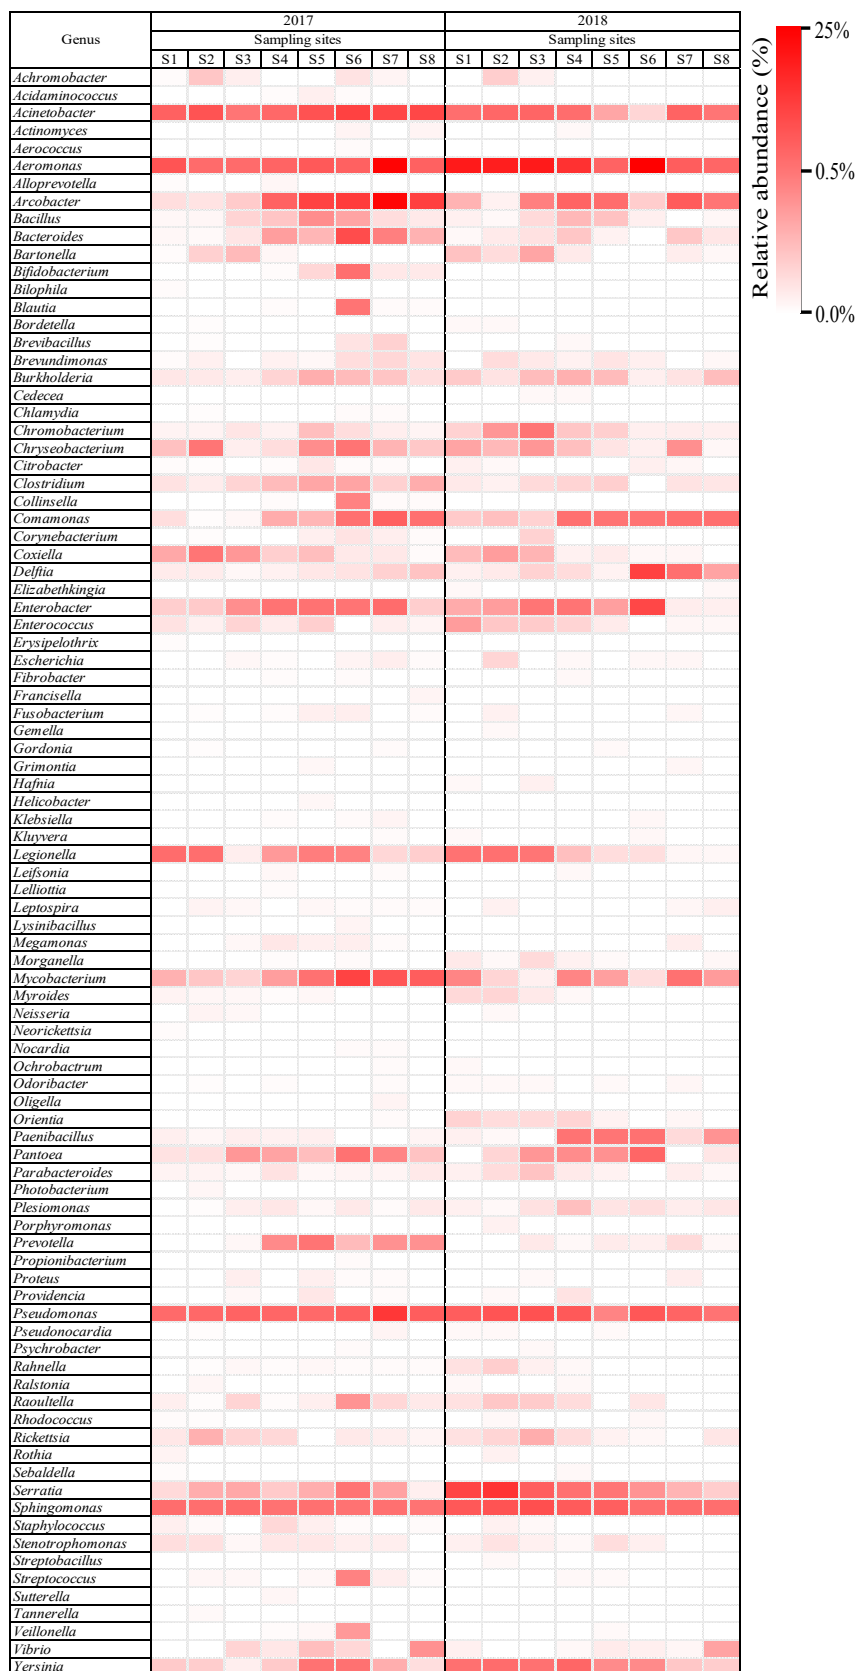

Figure S3. Heatmap showing the relative abundances of 35 potentially pathogenic genera identified.

Only genera that were present at >0.1% of the population are shown.

| Species                          | 2017           |    |    |    |    |    |    |    | 2018           |    |    |    |    |    |    |    |
|----------------------------------|----------------|----|----|----|----|----|----|----|----------------|----|----|----|----|----|----|----|
|                                  | Sampling sites |    |    |    |    |    |    |    | Sampling sites |    |    |    |    |    |    |    |
|                                  | S1             | S2 | S3 | S4 | S5 | S6 | S7 | S8 | S1             | S2 | S3 | S4 | S5 | S6 | S7 | S8 |
| <i>Bordetella bronchiseptica</i> |                |    |    |    |    |    |    |    |                |    |    |    |    |    |    |    |
| <i>Bordetella pertussis</i>      |                |    |    |    |    |    |    |    |                |    |    |    |    |    |    |    |
| <i>Brevundimonas vesicularis</i> |                |    |    |    |    |    |    |    |                |    |    |    |    |    |    |    |
| <i>Enterobacter hormaechei</i>   |                |    |    |    |    |    |    |    |                |    |    |    |    |    |    |    |
| <i>Fusobacterium nucleatum</i>   |                |    |    |    |    |    |    |    |                |    |    |    |    |    |    |    |
| <i>Fusobacterium varium</i>      |                |    |    |    |    |    |    |    |                |    |    |    |    |    |    |    |
| <i>Legionella sainthelensi</i>   |                |    |    |    |    |    |    |    |                |    |    |    |    |    |    |    |
| <i>Leifsonia aquatica</i>        |                |    |    |    |    |    |    |    |                |    |    |    |    |    |    |    |
| <i>Morganella morganii</i>       |                |    |    |    |    |    |    |    |                |    |    |    |    |    |    |    |
| <i>Proteus vulgaris</i>          |                |    |    |    |    |    |    |    |                |    |    |    |    |    |    |    |
| <i>Providencia stuartii</i>      |                |    |    |    |    |    |    |    |                |    |    |    |    |    |    |    |
| <i>Pseudomonas alcaligenes</i>   |                |    |    |    |    |    |    |    |                |    |    |    |    |    |    |    |
| <i>Vibrio fluvialis</i>          |                |    |    |    |    |    |    |    |                |    |    |    |    |    |    |    |
| <i>Vibrio mimicus</i>            |                |    |    |    |    |    |    |    |                |    |    |    |    |    |    |    |
| <i>Yersinia kristensenii</i>     |                |    |    |    |    |    |    |    |                |    |    |    |    |    |    |    |
| <i>Yersinia pestis</i>           |                |    |    |    |    |    |    |    |                |    |    |    |    |    |    |    |
| <i>Yersinia rohdei</i>           |                |    |    |    |    |    |    |    |                |    |    |    |    |    |    |    |
| <i>Yersinia ruckeri</i>          |                |    |    |    |    |    |    |    |                |    |    |    |    |    |    |    |

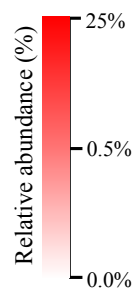

Figure S4. Heatmap showing the relative abundances of 18 potentially pathogenic species identified. Only species that were present at >0.1% of the population are shown.

Table S1. Primers, probes, and thermal conditions used for dPCR in this study.

| Target bacteria                                            | Target genes | primers, probes   | Sequence (5'-3')                       | μM   | Thermal conditions                                       | References              |
|------------------------------------------------------------|--------------|-------------------|----------------------------------------|------|----------------------------------------------------------|-------------------------|
| Shiga-toxin producing <i>E. coli</i> (STEC)                | <i>stx1</i>  | <i>Stx1</i> - f   | CATCGCGAGTTGCCAGAAT                    | 0.9  |                                                          |                         |
|                                                            |              | <i>Stx1</i> - r   | GCGTAATCCCACGGACTCTTC                  | 0.9  | 50°C, 2 min > 95°C, 30 sec > 95°C, 3 sec > 60°C, 30 sec; | [42]                    |
|                                                            |              | <i>Stx1</i> - pro | CTGCCGGACACATAGAAGGAACTCATCA-TAMRA     | 0.25 | 40 cycles                                                | Chui et al. (2010)      |
|                                                            | <i>stx2</i>  | <i>Stx2</i> - f   | CCGGAATGCAAATCAGTC                     | 0.9  |                                                          |                         |
|                                                            |              | <i>Stx2</i> - r   | CAGTGACAAAACGCAGAACT                   | 0.9  | 50°C, 2 min > 95°C, 30 sec > 95°C, 3 sec 56°C, 30 sec ;  | [42]                    |
|                                                            |              | <i>Stx2</i> - pro | ACTGAACTCCATTAACGCCAGATATGA-TAMRA      | 0.25 | 40 cycles                                                | Chui et al. (2010)      |
| Enteroinvasive <i>E. coli</i> (EIEC)/ <i>Shigella</i> spp. | <i>ipaH</i>  | <i>ipaH</i> - f   | CCTTTTCCGCGTTCCTTG                     | 0.2  |                                                          |                         |
|                                                            |              | <i>ipaH</i> - r   | CGGAATCCGGAGGTATTG C                   | 0.2  | 95°C, 10 min > 95°C, 30 sec >60°C, 1 min;                | [43]                    |
|                                                            |              | <i>ipaH</i> - pro | FAM - CGCCTTTCCGATACCGTCTCTGCA - TAMRA | 0.04 | 40 cycles                                                | Vu et al.(2004)         |
| <i>Campylobacter jejuni</i>                                | <i>hipO</i>  | <i>hipO</i> - f   | TGCACCAGTGACTATGAATAACGA               | 0.9  |                                                          |                         |
|                                                            |              | <i>hipO</i> - r   | TCCAAAATCCTCACTTGCCATT                 | 0.9  | 95°C, 10 min > 95°C, 20 min > 60°C, 1 min;               | [44]                    |
|                                                            |              | <i>hipO</i> - pro | TTGCAACCTCACTAGCAAAAATCCACAGCT-TAMRA   | 0.25 | 40 cycles                                                | Vondrakova et al.(2014) |
| <i>E. coli</i>                                             | <i>uidA</i>  | <i>uidA</i> - f   | CGGAAGCAACGCGTAAACTC                   | 0.3  | 95°C, 10 min > 95°C, 20 sec > 60°C, 1 min;               | [45]                    |
|                                                            |              | <i>uidA</i> - r   | TGAGCGTCGCAGAACATTACA                  | 0.9  | C, 1 min;                                                |                         |
|                                                            |              | <i>uidA</i> - pro | FAM-CGCGTCCGATCACCTGCGTC-TAMRA         | 0.3  | 50 cycles                                                | Silkie et al.(2008)     |
